# Supplementary material for: Differential Blood–Brain Barrier Transport and Cell Uptake of Cyclic Peptides In Vivo and In Vitro
Source: MDPI journal article supplement (doi:10.3390/pharmaceutics15051507), 2023-05-16
Supplement: s1 [file s1]

## Supplementary Material:

# Differential Blood–Brain Barrier Transport and Cell Uptake of Cyclic Peptides In Vivo and In Vitro

**Table S1.** Gradients used for cyclotide separation.

| Program (steps)  | Time (min) | Flow rate (mL/min) | %MPA  | %MPB |
|------------------|------------|--------------------|-------|------|
| <b>SFTI-1</b>    |            |                    |       |      |
| 1                | 0.00       | 0.300              | 100.0 | 0.0  |
| 2                | 0.50       | 0.300              | 100.0 | 0.0  |
| 3                | 6.00       | 0.300              | 60.0  | 40.0 |
| 4                | 6.50       | 0.300              | 100.0 | 0.0  |
| <b>Kalata B1</b> |            |                    |       |      |
| 1                | 0.00       | 0.300              | 90.0  | 10.0 |
| 2                | 2.00       | 0.300              | 45.0  | 55.0 |
| 3                | 2.50       | 0.300              | 90.0  | 10.0 |

Mobile phase A (MPA) was 90 % MilliQ-water, 10 % acetonitrile, and 0.05 % formic acid. Mobile phase B (MPB) was 10 % MilliQ-water, 90 % acetonitrile, and 0.05 % formic acid. Separation was performed on a Peptide CSH C18 column (50×2.1 mm; particle size, 1.7  $\mu$ m) (Waters, MA, USA).

**Table S2.** Settings of TQS-micro mass spectrometer for MRM quantification of SFTI-1 and kalata B1.

| Parameter               | Unit | SFTI-1 | Kalata B1 |
|-------------------------|------|--------|-----------|
| Capillary               | kV   | 3.40   | 1.70      |
| Cone                    | V    | 40.00  | 10.00     |
| Source temperature      | °C   | 150    | 150       |
| Desolvation temperature | °C   | 500    | 500       |
| Cone gas flow           | L/h  | 20     | 0         |
| Desolvation gas flow    | L/h  | 1100   | 1000      |
| Ion energy              | -    | 3.00   | −1.10     |

**Table S3.** Pharmacokinetic parameters used in simulation exercise.

| Parameter                                          | Unit                  | SFTI-1 | Kalata B1 |
|----------------------------------------------------|-----------------------|--------|-----------|
| <b>Systemic parameters</b>                         |                       |        |           |
| Systemic clearance, $CL$                           | mL/min/kg             | 1.82   | 1.6       |
| Systemic clearance, $CL$                           | L/h                   | 0.0327 | 0.0288    |
| Systemic clearance unbound, $CL_u$                 | L/h                   | 0.0307 | 0.0086    |
| Apparent volume of distribution, $V_d$             | mL/kg                 | 191    | 322       |
| Apparent volume of distribution, $V_d$             | L                     | 0.0573 | 0.0966    |
| Apparent volume of distribution unbound, $V_{d,u}$ | L                     | 0.054  | 0.029     |
| Fraction unbound in plasma, $f_{u,plasma}$         | (Unitless)            | 0.936  | 0.299     |
| <b>Brain distribution parameters</b>               |                       |        |           |
| $P_{app}$                                          | $\times 10^{-6}$ cm/s | 2.62   | 3.19      |

|                                                                            |                        |                    |                    |
|----------------------------------------------------------------------------|------------------------|--------------------|--------------------|
| <b>P<sub>app</sub> rat</b>                                                 | ×10 <sup>-6</sup> mL/s | 471.6 <sup>a</sup> | 574.2 <sup>a</sup> |
| <b>P<sub>app</sub> rat</b>                                                 | mL/s                   | 0.00047            | 0.000572           |
| <b>CL<sub>in</sub></b>                                                     | L/h                    | 0.00170            | 0.00207            |
| <b>CL<sub>out</sub></b>                                                    | L/h                    | 0.01317            | 0.43155            |
| <b>Total brain-to-plasma concentration ratio, K<sub>p,brain</sub></b>      | (Unitless)             | 0.0618±0.0318      | 0.234±0.083        |
| <b>Unbound brain-to-plasma concentration ratio, K<sub>p,un,brain</sub></b> | (Unitless)             | 0.129              | 0.00479            |
| <b>Total steady-state plasma concentration, C<sub>plasma,ss</sub></b>      | nmol/L                 | 400                | 1096               |
| <b>Total steady-state plasma concentration, C<sub>plasma,ss</sub></b>      | mg/L                   | 0.6052             | 3.169632           |
| <b>Unbound steady-state plasma concentration, C<sub>plasma,u,ss</sub></b>  | mg/L                   | 0.5664672          | 0.947719968        |
| <b>Unbound volume of distribution in brain, V<sub>u,brain</sub></b>        | mL/g brain             | 0.436              | 152                |
| <b>Unbound volume of distribution in brain, V<sub>u,brain</sub></b>        | L                      | 0.00078            | 0.2736             |
| <b>Infusion rate</b>                                                       | mg/h                   | 0.03816            | 0.03816            |
| <b>Rat weight</b>                                                          | kg                     | 0.3                | 0.3                |
| <b>Brain weight</b>                                                        | g                      | 1.8                | 1.8                |
| <b>Surface area BBB*</b>                                                   | cm <sup>2</sup>        | 180                | 180                |
| <b>Molecular mass</b>                                                      | Da                     | 1513               | 2892               |

<sup>a</sup>Similar apparent permeability in human BBB cell culture model and rat endothelial cells was assumed.

\* Hammarlund-Udenaes, M., Fridén, M., Syvänen, S. & Gupta, A. On the rate and extent of drug delivery to the brain. Pharm. Res. 25, 1737-1750 (2008).

**Table S4.** Permeability (Pe, 10<sup>-3</sup> cm/min) to sodium fluorescein in in vitro BBB model in the presence or absence of SFTI-1 and kalata B1.

| Treatment | Peptide concentration (nM) | Mean | SD   |
|-----------|----------------------------|------|------|
| Control   | 0                          | 0,46 | 0,12 |
| SFT1      | 250                        | 0,31 | 0,05 |
| SFT1      | 500                        | 0,32 | 0,02 |
| kalata B1 | 500                        | 0,50 | 0,10 |
| kalata B1 | 1000                       | 0,54 | 0,01 |
| kalata B1 | 2000                       | 0,47 | 0,07 |

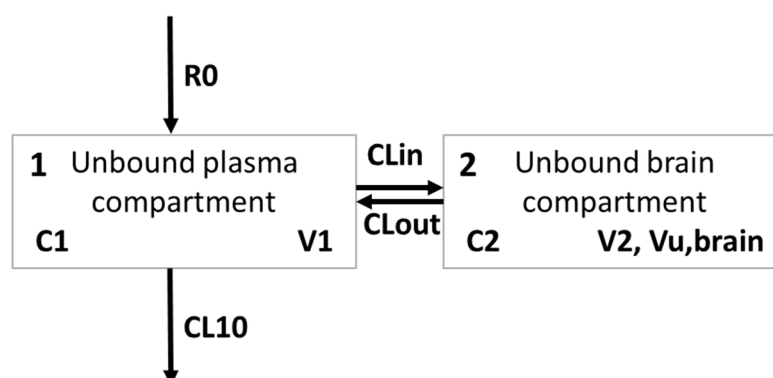

**Figure S1.** Model and code used for simulation of time concentration profiles for SFTI-1 and kalata B1.

### 1. SFTI-1

```

METHOD RK4
STARTTIME = 0
STOPTIME=24
DT = 0.02
d/dt(C1)=(R0-CL10*C1)/V1
d/dt(C2)=(CLin*C1-CLout*C2)/Vubrain
init C1 = 0.57; mg/L
init C2 = 0; mg/L
R0 = IF TIME <= INFSTOP THEN INFRATE ELSE 0
CL10 = 0.0307; L/h
CLin = 0.0016977; L/h
CLout = 0.01316; L/h
V1 = 0.054; L
Vubrain = 0.00078; L
INFRATE = 0.04; mg/h
INFSTOP = 4; h

```

### 2. Kalata B1

```

METHOD RK4
STARTTIME = 0
STOPTIME=24
DT = 0.02
d/dt(C1)=(R0-CL10*C1)/V1
d/dt(C2)=(CLin*C1-CLout*C2)/Vubrain
init C1 = 0.95; mg/L
init C2 = 0; mg/L
R0 = IF TIME <= INFSTOP THEN INFRATE ELSE 0
CL10 = 0.0086; L/h
CLin = 0.00206; L/h
CLout = 0.43; L/h
V1 = 0.0288 ; L
Vubrain = 0.274; L
INFRATE = 0.04; mg/h
INFSTOP = 4; h

```

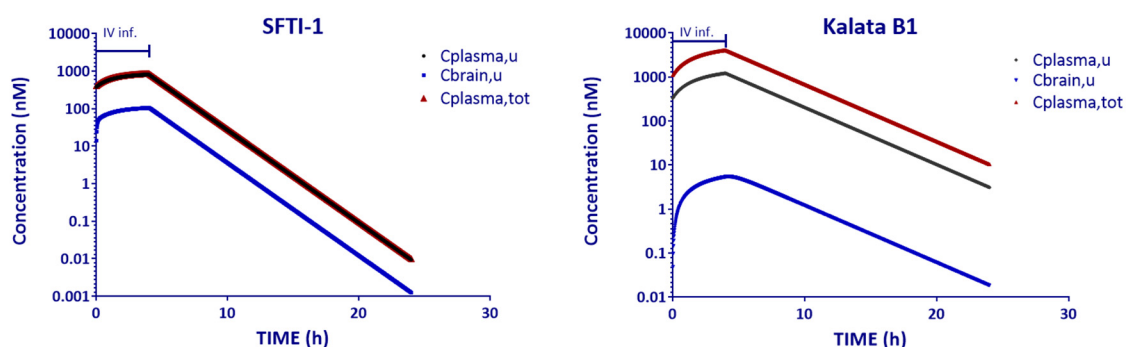

**Figure S2.** Simulation of total plasma (red), unbound plasma (black), and unbound brain (blue) concentrations (nM) of SFTI-1 and kalata B1 up to 24 h after and during a 4-hour constant-rate intravenous infusion (IV inf.) of the respective peptides. Because most SFTI-1 is unbound in plasma ( $f_{u,plasma}$  is 0.936), the unbound and total plasma concentrations of SFTI-1 are overlapping. The initial total plasma concentrations were selected based on the achieved *in vivo* concentration in rats in the current study, i.e., 400 nM for SFTI-1 and 1000 nM for kalata B1. NB: for direct comparison between two cCPPs the concentrations are presented in nM.

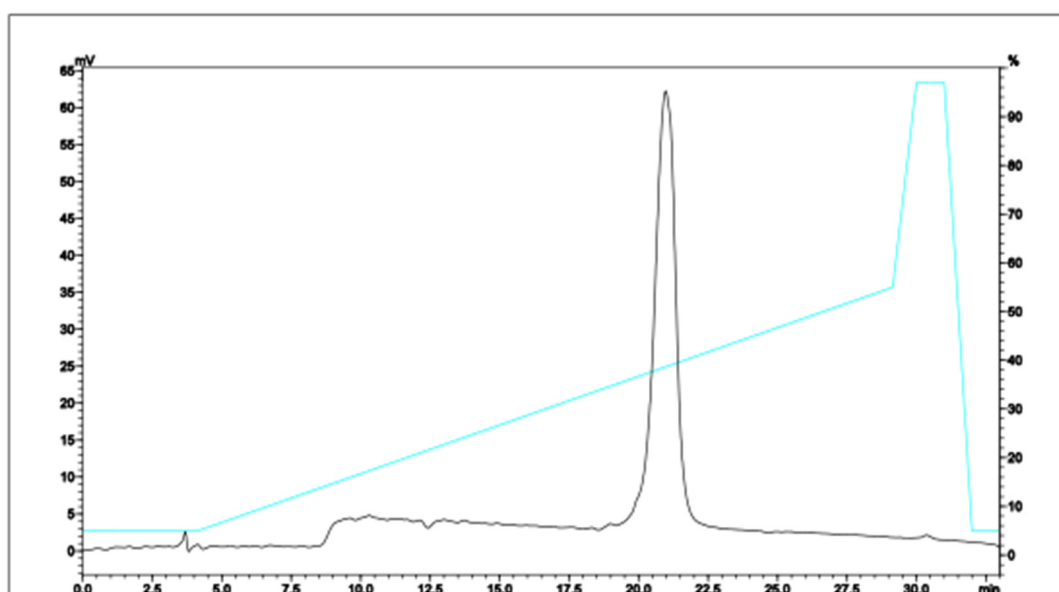

**Figure S3.** HPLC-UV chromatogram showing purity of SFTI-1, recorded at wavelength 215 nm. Gradient (in cyan) is the percentage of solvent B (0.045% TFA in ACN).
